# Supplementary material for: Integrated analyses of lncRNAs microarray profiles and mRNA–lncRNA coexpression in smooth muscle cells under hypoxic and normoxic conditions
Source: Oxford University Press journal article supplement (doi:10.1042/bsr20181783), 2019-03-08
Supplement: bsr-2018-1783_supp.pdf [file bsr-2018-1783_supp.pdf]

**Supplementary Table 1. Top 30 up-regulated lncRNAs**

| LncRNA_ID       | Length (bp) | Normoxia group | Hypoxia group | Log2FC  | Pvalue |
|-----------------|-------------|----------------|---------------|---------|--------|
| NONMMUT018986.1 | 2054        | 3.42           | 7.89          | 25.8244 | 0.0013 |
| NONMMUT002434.1 | 2866        | 4.22           | 7.87          | 18.07   | 0.0167 |
| NONMMUG014815.1 | 1557        | 4.67           | 8.06          | 17.12   | 0.0310 |
| NONMMUG041586.1 | 1326        | 4.37           | 7.57          | 16.10   | 0.0467 |
| NONMMUT117869.1 | 850         | 3.75           | 6.79          | 13.04   | 0.0380 |
| NONMMUT112794.1 | 3760        | 3.63           | 6.69          | 11.43   | 0.0218 |
| NONMMUT002084.1 | 1847        | 2.37           | 5.64          | 11.39   | 0.0319 |
| NR_015613.1     | 2941        | 3.61           | 6.41          | 10.78   | 0.0468 |
| NONMMUT128850.1 | 681         | 2.70           | 5.16          | 9.01    | 0.0112 |
| NONMMUT094293.1 | 950         | 3.64           | 6.51          | 8.17    | 0.0048 |

---

|                      |      |      |      |      |        |
|----------------------|------|------|------|------|--------|
| NONMMUT024146.1      | 826  | 3.38 | 5.84 | 6.97 | 0.0249 |
| NONMMUT020687.1      | 1508 | 3.71 | 6.01 | 6.73 | 0.0437 |
| NONMMUT121845.1      | 525  | 3.95 | 6.57 | 6.64 | 0.0028 |
| NONMMUG076404.1      | 525  | 3.96 | 6.58 | 6.64 | 0.0028 |
| ENSMUSG00000087495   | 1073 | 3.95 | 6.26 | 6.48 | 0.0370 |
| NONMMUG077390.1      | 1601 | 4.33 | 6.77 | 6.43 | 0.0160 |
| NONMMUG014406.2      | 1515 | 4.72 | 6.96 | 6.14 | 0.0390 |
| NONMMUG061752.1      | 635  | 3.96 | 6.14 | 5.99 | 0.0001 |
| ENSMUSG00000110670.1 | 8757 | 4.44 | 6.55 | 5.64 | 0.0001 |
| ENSMUSG00000108387.1 | 235  | 4.83 | 6.87 | 5.36 | 0.0470 |
| NONMMUG053745.1      | 4467 | 3.19 | 5.60 | 5.01 | 0.0046 |
| ENSMUSG00000107964.1 | 928  | 3.96 | 5.84 | 4.64 | 0.0490 |
| NONMMUG084694.1      | 1094 | 5.86 | 7.86 | 4.42 | 0.0120 |
| ENSMUSG00000106122.1 | 650  | 7.18 | 9.04 | 4.39 | 0.0380 |
| NONMMUG001028.2      | 2498 | 5.28 | 7.14 | 4.35 | 0.0370 |

---

|                      |     |      |      |      |        |
|----------------------|-----|------|------|------|--------|
| NONMMUG083485.1      | 650 | 4.99 | 6.88 | 4.25 | 0.0250 |
| NONMMUG000267.2      | 367 | 4.83 | 6.62 | 4.01 | 0.0310 |
| ENSMUSG00000084925.1 | 745 | 5.45 | 7.08 | 3.62 | 0.0440 |
| NONMMUG010408.2      | 890 | 3.75 | 5.49 | 3.45 | 0.0016 |
| NONMMUG003195.2      | 996 | 4.52 | 6.15 | 3.37 | 0.0180 |

FC: fold change=Hypoxia group/Normoxia group

### Supplementary Table 2. Top 30 down-regulated lncRNAs

| LncRNA_ID       | Length (bp) | Normoxia group | Hypoxia group | Log2FC | Pvalue |
|-----------------|-------------|----------------|---------------|--------|--------|
| NONMMUG020569.2 | 1341        | 4.38           | 3.33          | 0.15   | 0.016  |
| NONMMUG074505.2 | 10575       | 4.32           | 3.30          | 0.22   | 0.049  |
| NONMMUG011618.2 | 1245        | 4.01           | 2.93          | 0.24   | 0.029  |
| NONMMUG073129.1 | 508         | 5.52           | 4.45          | 0.24   | 0.020  |

---

|                      |      |      |      |      |        |
|----------------------|------|------|------|------|--------|
| NONMMUG039372.2      | 8424 | 3.99 | 2.91 | 0.26 | 0.024  |
| NONMMUG059164        | 307  | 4.06 | 3.09 | 0.26 | 0.020  |
| NONMMUG086291.1      | 1814 | 4.85 | 3.71 | 0.26 | 0.048  |
| NONMMUG021861.2      | 2536 | 4.29 | 3.24 | 0.27 | 0.012  |
| ENSMUSG00000099364.1 | 2092 | 4.28 | 3.26 | 0.27 | 0.016  |
| NONMMUG079609.1      | 823  | 4.39 | 3.25 | 0.27 | 0.048  |
| NONMMUG051365.1      | 1365 | 5.33 | 4.31 | 0.28 | 0.0037 |
| NONMMUG053048.1      | 807  | 4.27 | 3.23 | 0.28 | 0.017  |
| NONMMUG049312.1      | 1196 | 3.99 | 2.95 | 0.28 | 0.007  |
| NONMMUG082800.1      | 381  | 4.34 | 3.18 | 0.28 | 0.049  |
| NONMMUG050945.1      | 417  | 3.89 | 2.74 | 0.29 | 0.049  |
| NONMMUT097816.1      | 1835 | 5.11 | 3.99 | 0.29 | 0.035  |
| NONMMUG016420.2      | 1536 | 3.90 | 2.86 | 0.30 | 0.007  |
| NONMMUG057217.1      | 695  | 3.82 | 2.76 | 0.30 | 0.012  |

---

---

|                 |      |      |      |      |        |
|-----------------|------|------|------|------|--------|
| NONMMUG053072.1 | 213  | 5.19 | 4.07 | 0.30 | 0.045  |
| NONMMUG052409.1 | 220  | 3.85 | 2.71 | 0.30 | 0.049  |
| NONMMUG052496.1 | 873  | 4.66 | 3.55 | 0.30 | 0.047  |
| NONMMUG083353.1 | 3122 | 4.10 | 2.98 | 0.30 | 0.045  |
| NONMMUG072653.1 | 2818 | 3.77 | 2.70 | 0.30 | 0.018  |
| NONMMUG058127.1 | 288  | 4.59 | 3.44 | 0.30 | 0.045  |
| NONMMUG005355.2 | 4209 | 4.95 | 3.85 | 0.31 | 0.028  |
| NONMMUG064594.1 | 935  | 4.78 | 3.37 | 0.31 | 0.033  |
| NONMMUG013304.2 | 2314 | 3.93 | 2.78 | 0.31 | 0.048  |
| NONMMUG036722.2 | 1227 | 4.29 | 3.16 | 0.32 | 0.040  |
| NONMMUG058787.1 | 1032 | 4.69 | 3.64 | 0.32 | 0.0036 |
| NONMMUG068797.1 | 1440 | 4.30 | 3.18 | 0.32 | 0.030  |

---

FC: fold change=Hypoxia group/Normoxia group

**Supplementary Table 3. Sequences of PCR primers used for amplification of lncRNAs**

| LncRNA        | Forward primer         | Reverse primer         |
|---------------|------------------------|------------------------|
| NONMMUT018860 | CCGACCAGCCAAATCAACA    | GGTCTTTCAATCAAACCCAGTG |
| NONMMUT014985 | TAAGAGGCAGAGGCAAGGGAT  | GCACGGAGCCTAGTAAACAC   |
| NONMMUT017709 | GGGATGGCGGGATTGATG     | TGGGAAGAGGCAGGTGGAG    |
| NONMMUT100665 | GGCCTGTTCTGTCTGATTCATT | TATTTGCATACACCACCACCC  |
| NONMMUT013609 | TTCAAATCATCACAGCCAAGG  | CAGCCCACAAGGGATAGGTTA  |
| NONMMUT111660 | CTGAGTGGTAGGGTCTGGTGAG | GAGTTTTGGGCTTATGGGTCTT |
| NONMMUT105520 | CAGAGCAGGAGTTGATAGGGG  | GAGCAATCATCGACTGTGCC   |
| NONMMUT115524 | GGTGGTGAATGGCTGAGGA    | GGGAAAGGTGTTGTGAAAAGG  |
| NONMMUT021455 | CCCTGCTGTGCTCTACTAACCC | GAAGACTATCCCCTGGAAATGG |
| NONMMUT010688 | AGCACCCGAAGGGAAGAAG    | ATCAAACCAGCCAAGTACCAAC |
| NONMMUT022508 | ACTCAGCCTCAGCACCCACA   | GCCAACGTCAGACATCCTCTTC |

---

|               |                            |                         |
|---------------|----------------------------|-------------------------|
| NONMMUT010893 | TAGTCCGGCGTTTGGGTC         | TAGGTCTTTGGCAAGTGTTCCG  |
| NONMMUT092693 | AGTGCTTTTGGTTCCTTTGT       | ACTTCCCACCTTCCCTCTGA    |
| NONMMUT127165 | TGTGCTTTGGGCATGGTCT        | GAGGGCTTGGAAGTGTCCG     |
| NONMMUT086511 | CGCTTTCCTAGTTTCCCCTTAT     | AAATCCCTCACTGTGCCTTTT   |
| NONMMUT017642 | GGTATGGTTCTTGGTTTGGTCA     | GATCCCTCACTTTTGGATGGTA  |
| NONMMUT097430 | AACATGAAAGTTAAGATGTGTGGC   | CGGAGTGAGCAGAGGTCCTAA   |
| NONMMUT105680 | GGTTGCCAGGAAGACACGA        | AGACATGATCCAGGAAGGAGATT |
| NONMMUT105058 | ATAAAATAAGCCAACCTCAAACCAAG | GCAATTTCCCTGACATCCTCC   |
| NONMMUT121845 | ACATGACTGCCCAATGTGAGTT     | GGTTGAAGCATCATGGGTTTT   |
| NONMMUT002434 | GCCCTGGACCCTCTTACATT       | TGAGACCTCTGAGTTCCGATTT  |
| NONMMUT098768 | TCAAGGGAGAACCACCTACAAC     | GGGCTCACTTTCTCACGG      |

---

**Supplementary Table 4. Information of siRNAs sequences for transfection**

---

| LncRNA-siRNA | Sense/anti-sense |
|--------------|------------------|
|--------------|------------------|

---



---

LncRNA-NONMMUT021455

siRNA-1 5' -GGAAAGTTAGACAAGAAGAA -3' /

5' -GGCTCATCTTATTATAGTA-3'

siRNA-2 5' -CAGACTTCACCTACAGTAA -3' /

5' -GGAGAAAGAGCGAAGTGAAG -3'

siRNA-3 5' -GCAGCAGAATGCAGAGGAAG -3' /

5' -CCTTGCAAGTCATGACAAAC -3'

Control-siRNA

siRNA-control

5' -UUCUCCGAACGUGUCACGUTT -3' /

5' -ACGUGACACGUUCGGAGAATT -3'

---
